# Supplementary material
Source: publisher site journal article supplement (https://www.spandidos-publications.com/2745/downloadSupplementary)
Supplement: Supplementary file 1 [file downloadSupplementary]

## Sheet: Sheet1
Table SIII. GO enrichment of DEPs. GO, Gene Ontology; DEP, differentially expressed proteins.
GOIDs	Ontology	Description	Counts	Annotated	pvalue	p.adjust	IDs
GO:0070062	CC	extracellular exosome	30	2155	0.000480927	0.0290102	Q6AZ50/Q0VGK0/P60522/Q91XJ1
GO:0005794	CC	Golgi apparatus	14	686	0.000544253	0.0291176	D3ZAQ0/Q6AZ50/Q0VGK0/P60522
GO:0005789	CC	endoplasmic reticulum membrane	13	578	0.000346718	0.0258256	D3ZIJ5/D4A8N1
GO:0005741	CC	mitochondrial outer membrane	6	127	0.00034509	0.0258256	P33124/P37361/P42346/Q62760/Q5U1Z9/Q05982
GO:0006897	BP	endocytosis	6	134	0.000459449	0.0290102	Q8K4D6/D3ZAS9/D3ZIJ5/D4A8N1/G3V7V6/P33124/P42346/Q6P7R8/Q5RKJ9/M0R608/M0RDN9/D3ZTK0/Q91XJ1
GO:0008144	MF	drug binding	6	114	0.000192511	0.0258256	A0A0G2JXA1/A0A0G2K756/Q0VGK0/Q06486/Q6AY97/Q10743/Q6MG11/Q7TQ77/P62168/P60522/Q99N27/A0A0G2JSH5/Q5RKJ9/F1M1W4
GO:0051289	BP	protein homotetramerization	5	82	0.000337664	0.0258256	P13264/A0A0G2K1T0
GO:0000045	BP	autophagosome assembly	4	44	0.000294924	0.0258256	Q06486/B0BN19/O35180/M0R6E0/Q99N27/Q05982
GO:0000422	BP	autophagy of mitochondrion	4	33	9.46438e-05	0.0243045	Q0VGK0/P60522/Q91XJ1
GO:0031901	CC	early endosome membrane	4	59	0.000908097	0.044846	P10980/P37361/A0A0G2KAM4/P62813/A0A0G2JSH5/P02770
GO:0048666	BP	neuron development	4	46	0.000350519	0.0258256	G3V7Z3/P42346
GO:0006995	BP	cellular response to nitrogen starvation	3	12	7.96897e-05	0.0243045	A0A0G2JSH5/P02770
GO:0032148	BP	activation of protein kinase B activity	3	20	0.000395553	0.0267311	D4A507/O35180/O70257/Q99N27
GO:0004582	MF	dolichyl-phosphate beta-D-mannosyltransferase activity	2	5	0.000519653	0.0290102	P37361/P42346
GO:0006543	BP	glutamine catabolic process	2	4	0.000313296	0.0258256	P61149/A0A0G2JXN8/P37361
GO:0014736	BP	negative regulation of muscle atrophy	2	2	5.27216e-05	0.0225649	P10980/Q7TSU1
GO:0019836	BP	hemolysis by symbiont of host erythrocytes	2	2	5.27216e-05	0.0225649	D3ZIJ5/D4A8N1
GO:0032095	BP	regulation of response to food	2	4	0.000313296	0.0258256	A0A5D0/P04218
GO:0032280	CC	symmetric synapse	2	4	0.000313296	0.0258256	D4A7H9/Q91XJ1
GO:0033185	CC	dolichol-phosphate-mannose synthase complex	2	4	0.000313296	0.0258256	P49620/Q6MG11/P33124/Q91XJ1
GO:0043031	BP	negative regulation of macrophage activation	2	6	0.000775738	0.0398419	P06238/Q7TS56/P13264/P49655/A0A0G2K1T0
GO:0045324	BP	late endosome to vacuole transport	2	4	0.000313296	0.0258256	A0A0G2JSH5/P02770
GO:0051659	BP	maintenance of mitochondrion location	2	2	5.27216e-05	0.0225649	G3V7Z3/P37361
GO:0060547	BP	negative regulation of necrotic cell death	2	4	0.000313296	0.0258256	D4A2Z8/D3ZMX6/D3ZVU4/G3V9N7/A0A0G2JXA1/P51607/Q4KM86/Q6P742/D4A5K6/A0A0G2K8I0/M0RC17/B0BN19/M0R6E6/Q4KLI4/O35180/Q6AZ33/A0A0G2K014/D3ZYI0/P62168/A0A0G2KAM4/Q3KRE2/P02767/A0A0G2JSH5/Q9Z2S9/Q05982/P01041/Q9Z1E1/B3GNI6/D3ZBS2/Q5RKJ9
GO:0097051	BP	establishment of protein localization to endoplasmic reticulum membrane	2	5	0.000519653	0.0290102	A0A0G2JXA1/Q5RKJ9

## Sheet: Sheet2
Table SIII. GO enrichment of DEPs. GO, Gene Ontology; DEP, differentially expressed proteins.
GOIDs	Ontology	Description	Counts	Annotated	pvalue	p.adjust	IDs
GO:0070062	CC	extracellular exosome	35	2155	1.45329e-06	0.00176284	Q5RKJ9/Q5XI21/A0A0G2JXA1/D3ZRM5/F1M7V4/B0BN19/P81799/P51607/P23928/B0BNM9/Q05096/O08623/Q6AYR8/Q5I0M1/Q4QQW8/A0A0G2JU77/Q6P742/D3ZZ38/D3ZMX6/Q5FVH2/P02680/D3ZHC4/F7EZ89/Q6AYK6/M0RC17/F1LMW3/A0A0G2JUI5/B6ID11/P45479/Q6DGG1/Q5XIE8/Q4KLI4/O35547/D3ZN27/O55004
GO:0030425	CC	dendrite	13	482	2.98728e-05	0.0112245	P83953/F1LQC5/Q2THW7/Q6P6S0/Q9WVB9/Q91XJ1/P10980/M0RC17/P42346/Q4KM38/O88382/P45479/P15431
GO:0007032	BP	endosome organization	4	28	3.78123e-05	0.0112245	B0BN19/Q7TQ77/Q7TSU1/D3ZN27
GO:0071340	BP	skeletal muscle acetylcholine-gated channel clustering	3	10	3.61927e-05	0.0112245	Q5RKJ4/Q9WVB9/Q498C8
GO:0030981	CC	cortical microtubule cytoskeleton	2	2	4.62676e-05	0.0112245	Q66HR2/A0A0G2JUI5
GO:0005829	CC	cytosol	24	1610	0.000278522	0.0228577	A0A0G2JTR4/Q99N27/Q5XI21/P83953/B2RYA8/P23928/Q7TQ77/B2RZ79/B2RYI8/M0RDN9/Q0VGK0/Q9WVB9/D3ZYT8/Q7TSU1/F1LT70/Q6AY57/P14646/P42346/Q4KM38/F1LQ89/B6ID11/P45479/Q6DGG1/Q924K2
GO:0005794	CC	Golgi apparatus	14	686	0.000282659	0.0228577	Q5RKJ9/Q99N27/Q66HR2/A0A0G2JXA1/Q6AY97/D3ZZP2/P23928/Q7TQ77/A0A0G2K756/Q0VGK0/A0A0G2JUI5/P45479/Q5XIE8/Q62720
GO:0005789	CC	endoplasmic reticulum membrane	13	578	0.000184191	0.0228577	Q5RKJ9/P61621/D4A8N1/D3ZIJ5/D3ZM03/M0RDN9/D3ZTK0/Q91XJ1/Q5FVH2/P33124/P42346/Q5NDF0/Q7TMC1
GO:0010008	CC	endosome membrane	5	84	0.00028007	0.0228577	Q99N27/D3ZRM5/Q05096/Q91XJ1/Q5XIE8
GO:0000045	BP	autophagosome assembly	4	44	0.000230203	0.0228577	D3ZRM5/Q0VGK0/Q91XJ1/Q6AY57
GO:0045335	CC	phagocytic vesicle	4	39	0.000143242	0.0228577	D3ZRM5/B0BN19/D3ZZP2/Q91XJ1
GO:0032280	CC	symmetric synapse	2	4	0.000275113	0.0228577	Q7TSU1/P10980
GO:0033185	CC	dolichol-phosphate-mannose synthase complex	2	4	0.000275113	0.0228577	D4A8N1/D3ZIJ5
GO:0045324	BP	late endosome to vacuole transport	2	4	0.000275113	0.0228577	Q91XJ1/D4A7H9
GO:2000672	BP	negative regulation of motor neuron apoptotic process	2	4	0.000275113	0.0228577	D3ZIV9/F1LQ89
GO:0005763	CC	mitochondrial small ribosomal subunit	3	21	0.000379527	0.0287729	Q5I0K8/Q9EPJ3/D3ZY44
GO:0016607	CC	nuclear speck	6	141	0.000426819	0.0291413	A1A5S1/Q63470/Q3KR55/P46933/F1LM66/Q4KM38
GO:0004582	MF	dolichyl-phosphate beta-D-mannosyltransferase activity	2	5	0.000456459	0.0291413	D4A8N1/D3ZIJ5
GO:0097051	BP	establishment of protein localization to endoplasmic reticulum membrane	2	5	0.000456459	0.0291413	Q5RKJ9/A0A0G2JXA1
GO:0000159	CC	protein phosphatase type 2A complex	3	25	0.000643272	0.0390144	A0A0G2JSQ0/G3V6L8/A0A0G2JTA1
GO:0005776	CC	autophagosome	4	59	0.000712666	0.0392938	D3ZRM5/O08623/Q91XJ1/Q6AY57
GO:0019262	BP	N-acetylneuraminate catabolic process	2	6	0.000681611	0.0392938	P81799/P51607
